# Supplementary material for: Anti-inflammatory effects of interleukin-23 receptor cytokine-binding homology region rebalance T cell distribution in rodent collagen-induced arthritis
Source: PubMed Central journal article supplement (PMC5077977; doi:10.18632/oncotarget.9309), 2016-05-11
Supplement: oncotarget-07-31800-s001.pdf [file oncotarget-07-31800-s001.pdf]

# Anti-inflammatory effects of Interleukin-23 receptor cytokine-binding homology region rebalance T cell distribution in rodent collagen-induced arthritis

## Supplementary Material

**Suppl. Table 1: RT-PCR primers for rats**

| Primer name                  | Sequences                      |
|------------------------------|--------------------------------|
| Rat $\beta$ -actin (Forward) | 5'-CCCGCGAGTACAACCTTCT-3'      |
| Rat $\beta$ -actin (Reverse) | 5'-CGTCATCCATGGCGAACT-3'       |
| Rat IL-17A (Forward)         | 5'-CTTCACCCTGGACTCTGAGC-3'     |
| Rat IL-17A (Reverse)         | 5'-CCTCAGCGTTGACACAGC-3'       |
| Rat IL-22 (Forward)          | 5'-CTACTACTCCCACCGTTGATG-3'    |
| Rat IL-22 (Reverse)          | 5'-CCTCCCTTACCAAAGAGCTG-3'     |
| Rat ROR $\gamma$ t (Forward) | 5'-TACACGGCCTTGGTTCTCAT-3'     |
| Rat ROR $\gamma$ t (Reverse) | 5'-GCAGATGCTCCACTCTCCTC-3'     |
| Rat IL-23R (Forward)         | 5'-TGCAAAATGACTCACCCAGT-3'     |
| Rat IL-23R (Reverse)         | 5'-CAAATTCATCAGGCAGCAGA-3'     |
| Rat TNF- $\alpha$ (Forward)  | 5'-CCCTGGTACTAACTCCCAGAAA-3'   |
| Rat TNF- $\alpha$ (Reverse)  | 5'-TGTATGAGAGGGACGGAACC-3'     |
| Rat MMP-3 (Forward)          | 5'-GATGTAGAGGGCCTAACCCA-3'     |
| Rat MMP-3 (Reverse)          | 5'-CATAGCTTGCTGTGCCATTT-3'     |
| Rat IL-10 (Forward)          | 5'-CAGAGCTCAGGAACTGCTG-3'      |
| Rat IL-10 (Reverse)          | 5'-AGGCCTGGTCTTCTTTCAGA-3'     |
| Rat Foxp3 (Forward)          | 5'-ACAAGGATCCTACCCACTGC-3'     |
| Rat Foxp3 (Reverse)          | 5'-ATGCAGTTTAGCCCTTTGCT-3'     |
| Rat PU.1 (Forward)           | 5'-AGACCAACCTATTAAGACCAT-3'    |
| Rat PU.1 (Reverse)           | 5'-CATCCATCCAACCATTATCC-3'     |
| Rat IRF4 (Forward)           | 5'-TGAAGTCGCTTATACATCTTATAG-3' |
| Rat IRF4 (Reverse)           | 5'-GTTGATACACTCTGGTAGGA-3'     |

|                    |                               |
|--------------------|-------------------------------|
| Rat IL-9 (Forward) | 5'- CCCTAAAGAGCAACAAGTGTC -3' |
| Rat IL-9 (Reverse) | 5'- GTGTTGCCTGCTGTGGTCT-3'    |

**Suppl, Table 2: RT-PCR primers for human**

| Primer name        | Sequences                   |
|--------------------|-----------------------------|
| hβ-actin (Forward) | 5'-TGGACTTCGAGCAAGAGATG-3'  |
| hβ-actin (Reverse) | 5'-GAAGGAAGGCTGGAAGAGTG-3'  |
| hMMP-3 (Forward)   | 5'-GCAAGACAGCAAGGCATAGA-3'  |
| hMMP-3 (Reverse)   | 5'-TGGATAGGCTGAGCAAAGCTG-3' |
